# Supplementary material for: Brain songs framework used for discovering the relevant timescale of the human brain
Source: PubMed Central journal article supplement (PMC6361902; doi:10.1038/s41467-018-08186-7), 2019-02-04
Supplement: 41467_2018_8186_MOESM3_ESM.pdf [file 41467_2018_8186_MOESM3_ESM.pdf]

## Reporting Summary

Nature Research wishes to improve the reproducibility of the work that we publish. This form provides structure for consistency and transparency in reporting. For further information on Nature Research policies, see [Authors & Referees](#) and the [Editorial Policy Checklist](#).

### Statistical parameters

When statistical analyses are reported, confirm that the following items are present in the relevant location (e.g. figure legend, table legend, main text, or Methods section).

n/a Confirmed

- The exact sample size ( $n$ ) for each experimental group/condition, given as a discrete number and unit of measurement
- An indication of whether measurements were taken from distinct samples or whether the same sample was measured repeatedly
- The statistical test(s) used AND whether they are one- or two-sided  
*Only common tests should be described solely by name; describe more complex techniques in the Methods section.*
- A description of all covariates tested
- A description of any assumptions or corrections, such as tests of normality and adjustment for multiple comparisons
- A full description of the statistics including central tendency (e.g. means) or other basic estimates (e.g. regression coefficient) AND variation (e.g. standard deviation) or associated estimates of uncertainty (e.g. confidence intervals)
- For null hypothesis testing, the test statistic (e.g.  $F$ ,  $t$ ,  $r$ ) with confidence intervals, effect sizes, degrees of freedom and  $P$  value noted  
*Give  $P$  values as exact values whenever suitable.*
- For Bayesian analysis, information on the choice of priors and Markov chain Monte Carlo settings
- For hierarchical and complex designs, identification of the appropriate level for tests and full reporting of outcomes
- Estimates of effect sizes (e.g. Cohen's  $d$ , Pearson's  $r$ ), indicating how they were calculated
- Clearly defined error bars  
*State explicitly what error bars represent (e.g. SD, SE, CI)*

*Our web collection on [statistics for biologists](#) may be useful.*

### Software and code

Policy information about [availability of computer code](#)

|                 |                                                                                                                                                                                                                                      |
|-----------------|--------------------------------------------------------------------------------------------------------------------------------------------------------------------------------------------------------------------------------------|
| Data collection | Standard MRI and MEG scanner software                                                                                                                                                                                                |
| Data analysis   | Standard imaging tools for preprocessing FSL (FMRIB Software Library), FreeSurfer, and the Connectome Workbench software. Custom-made MATLAB scripts were used for whole-brain modelling. We will make these available upon request. |

For manuscripts utilizing custom algorithms or software that are central to the research but not yet described in published literature, software must be made available to editors/reviewers upon request. We strongly encourage code deposition in a community repository (e.g. GitHub). See the Nature Research [guidelines for submitting code & software](#) for further information.

### Data

Policy information about [availability of data](#)

All manuscripts must include a [data availability statement](#). This statement should provide the following information, where applicable:

- Accession codes, unique identifiers, or web links for publicly available datasets
- A list of figures that have associated raw data
- A description of any restrictions on data availability

The code and multimodal neuroimaging data from the experiment are available upon request.

## Field-specific reporting

Please select the best fit for your research. If you are not sure, read the appropriate sections before making your selection.

Life sciences  Behavioural & social sciences  Ecological, evolutionary & environmental sciences

For a reference copy of the document with all sections, see [nature.com/authors/policies/ReportingSummary-flat.pdf](https://www.nature.com/authors/policies/ReportingSummary-flat.pdf)

## Life sciences study design

All studies must disclose on these points even when the disclosure is negative.

|                 |                                                                                                                                                                                                                                              |
|-----------------|----------------------------------------------------------------------------------------------------------------------------------------------------------------------------------------------------------------------------------------------|
| Sample size     | We used data from two populations. One group of 16 participants from Aarhus, Denmark and one group of 100 unrelated participants from the public available database from the Human Connectome Project (HCP) from the WU-Minn HCP Consortium. |
| Data exclusions | N/A                                                                                                                                                                                                                                          |
| Replication     | Findings from Dataset 1 were replicated in Dataset 2                                                                                                                                                                                         |
| Randomization   | N/A                                                                                                                                                                                                                                          |
| Blinding        | N/A                                                                                                                                                                                                                                          |

## Reporting for specific materials, systems and methods

### Materials & experimental systems

|                                     |                                                                 |
|-------------------------------------|-----------------------------------------------------------------|
| n/a                                 | Involvement in the study                                        |
| <input checked="" type="checkbox"/> | <input type="checkbox"/> Unique biological materials            |
| <input checked="" type="checkbox"/> | <input type="checkbox"/> Antibodies                             |
| <input checked="" type="checkbox"/> | <input type="checkbox"/> Eukaryotic cell lines                  |
| <input checked="" type="checkbox"/> | <input type="checkbox"/> Palaeontology                          |
| <input checked="" type="checkbox"/> | <input type="checkbox"/> Animals and other organisms            |
| <input type="checkbox"/>            | <input checked="" type="checkbox"/> Human research participants |

### Methods

|                                     |                                                            |
|-------------------------------------|------------------------------------------------------------|
| n/a                                 | Involvement in the study                                   |
| <input checked="" type="checkbox"/> | <input type="checkbox"/> ChIP-seq                          |
| <input checked="" type="checkbox"/> | <input type="checkbox"/> Flow cytometry                    |
| <input type="checkbox"/>            | <input checked="" type="checkbox"/> MRI-based neuroimaging |

## Human research participants

Policy information about [studies involving human research participants](#)

|                            |                                                                                                                                                                                                                                                                                                                                                                                                                                                                                                                                                                                                                                                                                                                                                                                                                          |
|----------------------------|--------------------------------------------------------------------------------------------------------------------------------------------------------------------------------------------------------------------------------------------------------------------------------------------------------------------------------------------------------------------------------------------------------------------------------------------------------------------------------------------------------------------------------------------------------------------------------------------------------------------------------------------------------------------------------------------------------------------------------------------------------------------------------------------------------------------------|
| Population characteristics | We used data from two populations. One group of 16 participants from Aarhus, Denmark and one group of 100 unrelated participants from the public available database from the Human Connectome Project (HCP) from the WU-Minn HCP Consortium.                                                                                                                                                                                                                                                                                                                                                                                                                                                                                                                                                                             |
| Recruitment                | Dataset 1: The online recruitment system at Aarhus University helped to recruit all 16 healthy right-handed participants (11 men and 5 women, mean age: 24.75+/-2.54). We screened participants and excluded those with psychiatric or neurological disorders (or a history thereof) from participation in this study.<br>Dataset 2: The data set used for this investigation was selected from the March 2017 public data release from the Human Connectome Project (HCP) where we chose the sample of 100 unrelated participants (54 females, 46 males, mean age=29.1+/-3.7 years). This subset of participants provided by HCP ensures that they are not family relatives. This criterion was important to exclude possible identifiability confounds and the need for family-structure co-variables in the analyses. |

## Magnetic resonance imaging

Experimental design

|                       |                                                                                                                                                                                                                                                                                                                                      |
|-----------------------|--------------------------------------------------------------------------------------------------------------------------------------------------------------------------------------------------------------------------------------------------------------------------------------------------------------------------------------|
| Design type           | Resting state and task design                                                                                                                                                                                                                                                                                                        |
| Design specifications | Dataset 1: We collected approximately seven minutes of resting state data for 16 subjects.<br>Dataset 2: 100 unrelated HCP participants. The HCP website ( <a href="http://www.humanconnectome.org/">http://www.humanconnectome.org/</a> ) provides the full details of participants, the acquisition and preprocessing of the data. |

Behavioral performance measures

## Acquisition

Imaging type(s)

Field strength

Sequence & imaging parameters http://www.humanconnectome.org/) provides the full details of participants, the acquisition and preprocessing of the data."/>

Area of acquisition

Diffusion MRI  Used  Not used

Parameters

## Preprocessing

Preprocessing software

Normalization

Normalization template

Noise and artifact removal

Volume censoring

## Statistical modeling & inference

Model type and settings

Effect(s) tested

Specify type of analysis:  Whole brain  ROI-based  Both

Statistic type for inference   
(See [Eklund et al. 2016](#))

Correction

## Models & analysis

n/a | Involved in the study  
  Functional and/or effective connectivity  
  Graph analysis  
  Multivariate modeling or predictive analysis

Functional and/or effective connectivity
